# Supplementary material for: Achieving an Ohmic contact in graphene-based van der Waals heterostructures by intrinsic defects and the inner polarized electric field of Janus AlGaSSe
Source: Royal Society of Chemistry journal article supplement (doi:10.1039/d1nj03861c), 2021-01-01
Supplement: d1nj03861c1.pdf [file d1nj03861c1.pdf]

## Supplementary Information

### **Achieving Ohmic contact in graphene-based van der Waals heterostructures by intrinsic defects and inner polarized electric field of Janus AlGaSSe**

Jiaming Wang, Dongxue Zhang, Baozeng Zhou\*

*Tianjin Key Laboratory of Film Electronic & Communicate Devices, School of Integrated Circuit*

*Science and Engineering, Tianjin University of Technology, Tianjin 300384, China*

\*Corresponding Authors

[baozeng@tju.edu.cn](mailto:baozeng@tju.edu.cn) (B. Zhou)

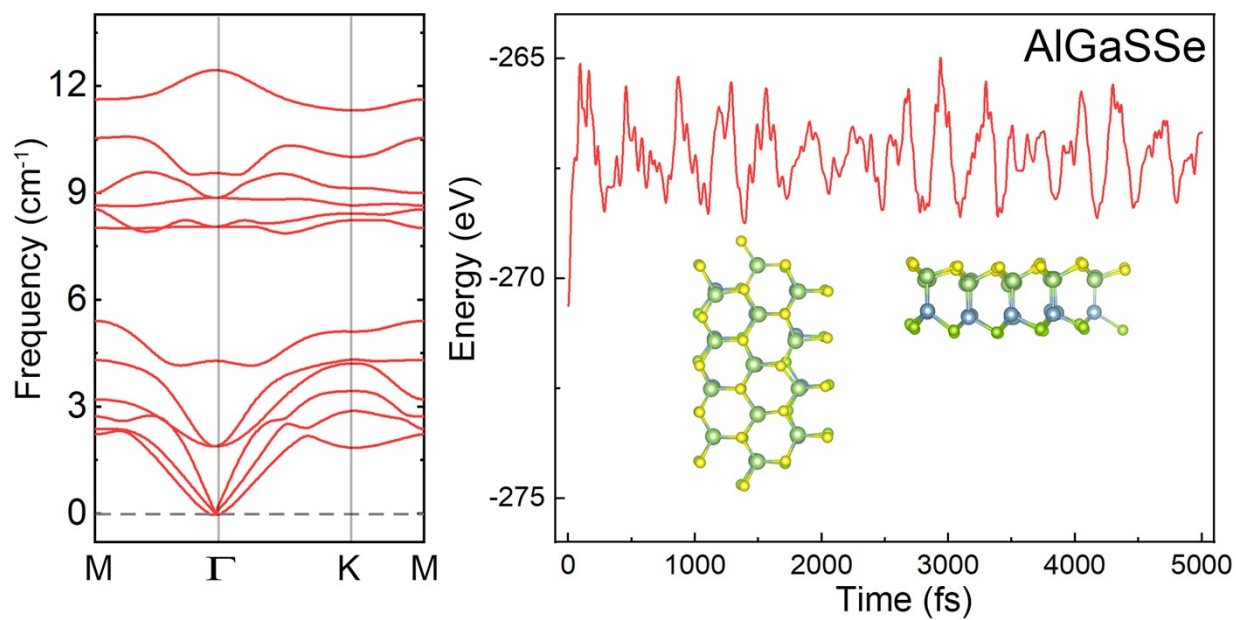

**Fig. S1.** The phonon dispersion curve and potential energy fluctuation of AlGaSSe monolayer as a function of simulation time at 400 K. The inset shows the corresponding structure at 400 K after the simulation for 5 ps.

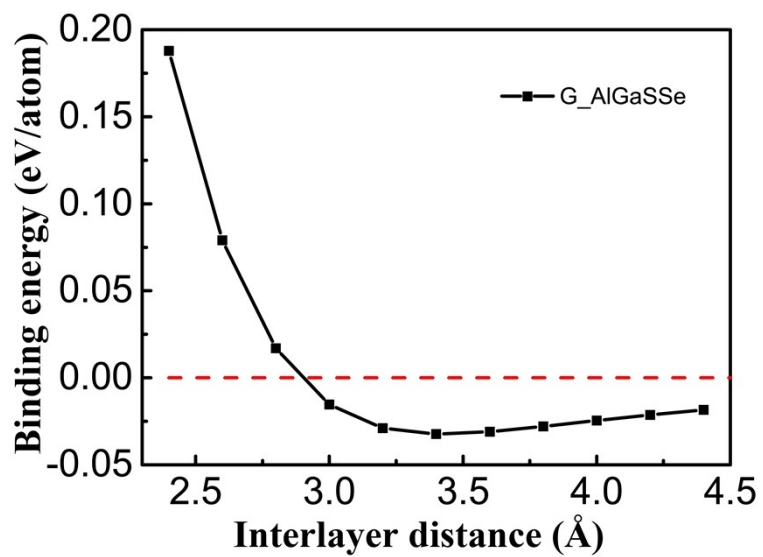

**Fig. S2.** Relationship between binding energy and interlayer distance of G/AlGaSSe.

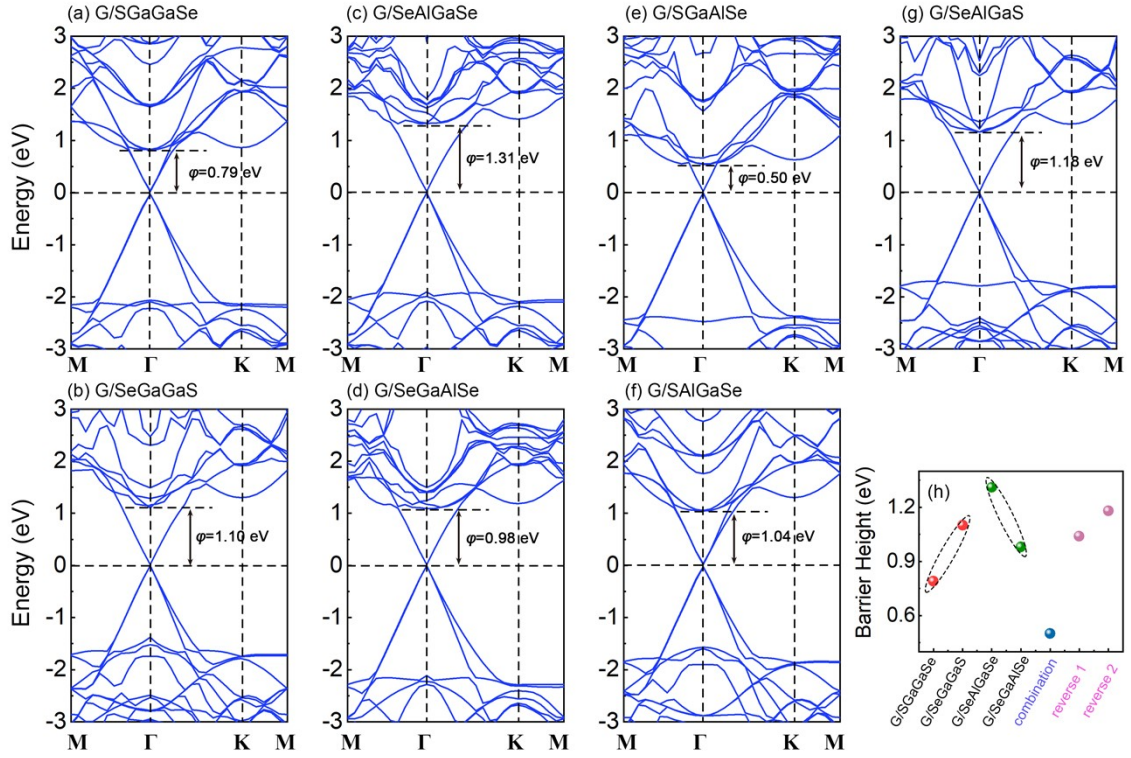

**Fig. S3.** Calculated band structures of (a) G/SGaGaSe, (b) G/SeGaGaS, (c) G/SeAlGaSe, (d) G/SeGaAlSe, (e) G/SGaAlSe, (f) G/SAlGaSe, and (g) G/SeAlGaS heterostructures by HSE06 method. (h) Summary of the barrier height.
